# Supplementary material
Source: MDPI journal article supplement (https://www.mdpi.com/2673-3293/2/4/34)
Supplement: s1 [file s1 › electrochem-1387423-supplementary.pdf]

## Supporting Information

# Synthesis and Characterization of Supercapacitor Materials from Soy

Iris Denmark<sup>1</sup>, Amna Khan<sup>2</sup>, Taylor Scifres<sup>1</sup>, Tito Viswanathan<sup>1</sup>, Fumiya Watanabe<sup>3</sup>, Noreen Siraj<sup>1\*</sup>

<sup>1</sup> Department of Chemistry, University of Arkansas at Little Rock, 2801 S. University Ave, Little Rock, AR 72204, USA; isdenmark@ualr.edu (I.D.); tbscifres@ualr.edu (T.S.); txviswanatha@ualr.edu (T.V.)

<sup>2</sup> Little Rock Central High School, Little Rock, AR 72202, USA; akaykhan@gmail.com

<sup>3</sup> Center for Integrative Nanotechnology Sciences, University of Arkansas at Little Rock, 2801 S. University Ave, Little Rock, AR 72204, USA; fxwatanabe@ualr.edu

\* Correspondence: nxsiraj@ualr.edu

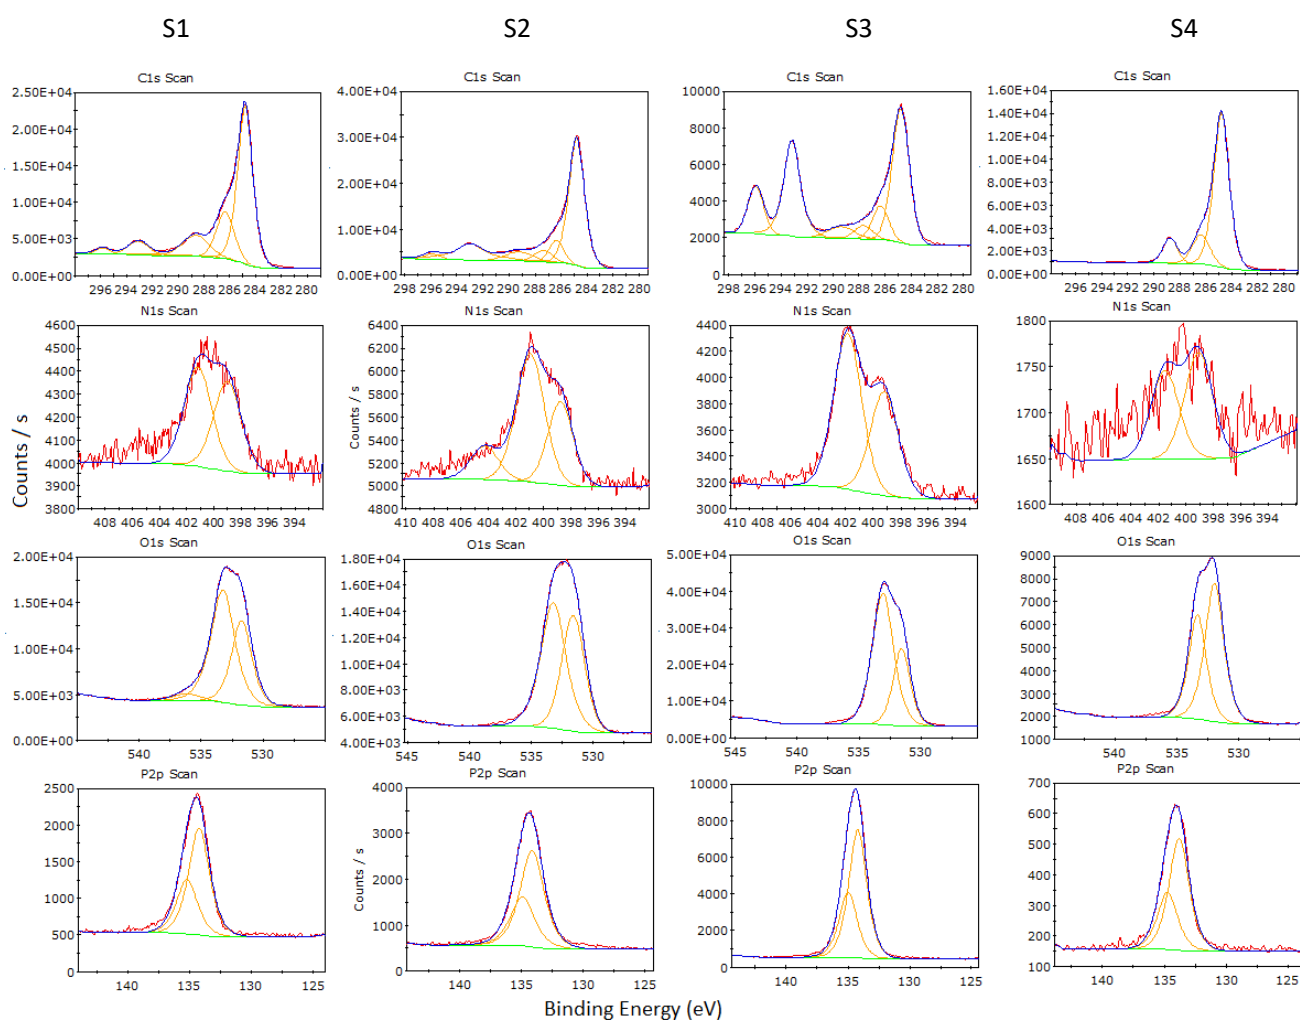

**Figure S1.** Narrow scan compilation of soy-based PNDC materials.

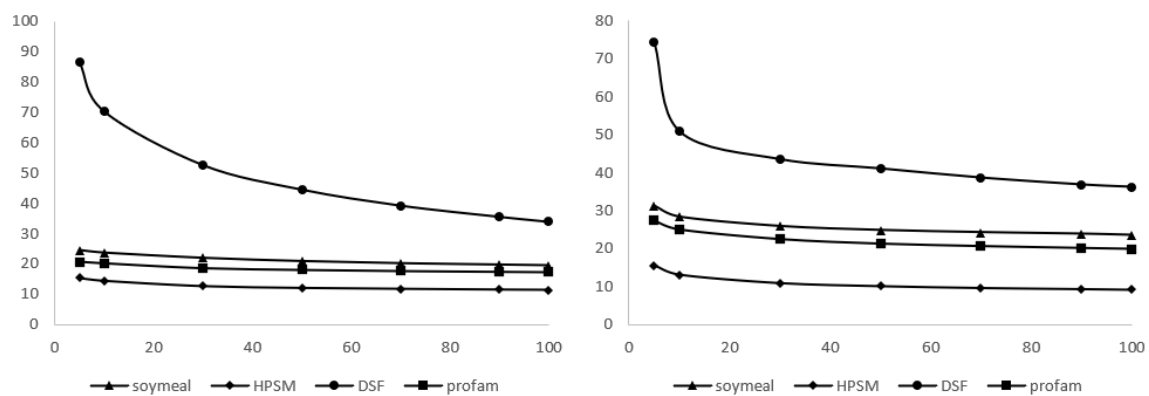

**Figure S2.** Plot of specific capacitance with relation to scan rate in KCl (left) and KNO<sub>3</sub> (right).
